# Supplementary material for: BolA Is a Transcriptional Switch That Turns Off Motility and Turns On Biofilm Development
Source: PubMed Central journal article supplement — mBio. 2015 Feb 17;6(1):e02352-14. doi: 10.1128/mBio.02352-14 (PMC4337573; doi:10.1128/mbio.02352-14), 2015-02-17
Supplement: mbo001152173st1.pdf [file mbo001152173st1.pdf]

**Table S1** - List of strains and plasmids used in this work

| Strain                | Relevant marker (s) or genotype <sup>a</sup>                                                                                                                                                                                                                                                                                                                                                                                            | Source or reference        |                     |
|-----------------------|-----------------------------------------------------------------------------------------------------------------------------------------------------------------------------------------------------------------------------------------------------------------------------------------------------------------------------------------------------------------------------------------------------------------------------------------|----------------------------|---------------------|
| <b>wt (CGSC 6300)</b> | MG1655 F <sup>-</sup> λ <sup>-</sup> rph-1                                                                                                                                                                                                                                                                                                                                                                                              | (1)                        |                     |
| <b>MC1061</b>         | F <sup>-</sup> Δ( <i>ara-leu</i> )7697 [ <i>araD</i> 139]B/r Δ( <i>codB-lacI</i> )3 <i>galK</i> 16 <i>galE</i> 15 λ <sup>-</sup> e14 <sup>-</sup> <i>mcrA</i> 0 <i>relA</i> 1 <i>rpsL</i> 150( <i>strR</i> ) <i>spoT</i> 1 <i>mcrB</i> 1 <i>hsdR</i> 2(r-m+) <i>recA</i> 1 <i>endA</i> 1 <i>gyrA</i> 96 <i>thi-hsdR</i> 17 <i>supE</i> 44 <i>relA</i> 1 Δ( <i>lacZYA</i> <sup>-</sup> <i>argF</i> )U169<br><i>φ</i> 80 <i>dlacZΔM15</i> | (2)                        |                     |
| <b>DH5α</b>           |                                                                                                                                                                                                                                                                                                                                                                                                                                         | New England Biolabs        |                     |
| <b>BL21(DE3)</b>      | F <sup>-</sup> <i>ompT</i> <i>hsdSB</i> (rB <sup>-</sup> , mB <sup>-</sup> ) <i>gal dcm</i> (DE3)                                                                                                                                                                                                                                                                                                                                       | Invitrogen                 |                     |
| <b>CMA50</b>          | BL21(DE3) carrying pPFA02 plasmid                                                                                                                                                                                                                                                                                                                                                                                                       | (3)                        |                     |
| <b>CMA94</b>          | MG1655 Δ <i>bolA</i> ::Kan <sup>r</sup>                                                                                                                                                                                                                                                                                                                                                                                                 | This study                 |                     |
| <b>CMA95</b>          | MG1655 Δ <i>bolA</i> ::Kan <sup>r</sup> carrying pCDA02 plasmid                                                                                                                                                                                                                                                                                                                                                                         | This study                 |                     |
| <b>CMA96</b>          | MG1655 <i>bolA</i> ::3xFlag-Kan <sup>r</sup>                                                                                                                                                                                                                                                                                                                                                                                            | This study                 |                     |
| <b>CMA97</b>          | MG1655 carrying pMAK580 plasmid                                                                                                                                                                                                                                                                                                                                                                                                         | This study                 |                     |
| <b>CMA98</b>          | MG1655 Δ <i>bolA</i> ::Kan <sup>r</sup> carrying pBAD plasmid                                                                                                                                                                                                                                                                                                                                                                           | This study                 |                     |
| <b>CMA99</b>          | MG1655 carrying pBAD plasmid                                                                                                                                                                                                                                                                                                                                                                                                            | This study                 |                     |
| <b>CMA805</b>         | MC1061 Δ <i>bolA</i> ::kan <sup>r</sup>                                                                                                                                                                                                                                                                                                                                                                                                 | This study                 |                     |
| <b>CMA806</b>         | MC1061 carrying pSP417 plasmid                                                                                                                                                                                                                                                                                                                                                                                                          | This study                 |                     |
| <b>CMA807</b>         | MC1061 Δ <i>bolA</i> ::kan <sup>r</sup> carrying pSP417 plasmid                                                                                                                                                                                                                                                                                                                                                                         | This study                 |                     |
| <b>CMA808</b>         | MC1061 carrying pSBA01 plasmid                                                                                                                                                                                                                                                                                                                                                                                                          | This study                 |                     |
| <b>CMA809</b>         | MC1061 Δ <i>bolA</i> ::kan <sup>r</sup> carrying pSBA01 plasmid                                                                                                                                                                                                                                                                                                                                                                         | This study                 |                     |
| <b>CMA810</b>         | MC1061 carrying pSBA02 plasmid                                                                                                                                                                                                                                                                                                                                                                                                          | This study                 |                     |
| <b>CMA811</b>         | MC1061 Δ <i>bolA</i> ::kan <sup>r</sup> carrying pSBA02 plasmid                                                                                                                                                                                                                                                                                                                                                                         | This study                 |                     |
| Plasmid               | Description                                                                                                                                                                                                                                                                                                                                                                                                                             | Origin/marker <sup>a</sup> | Source or reference |
| <b>pPFA02</b>         | pET28a plasmid encoding (His) <sub>6</sub> -Bola                                                                                                                                                                                                                                                                                                                                                                                        | Kan <sup>r</sup>           | (3)                 |
| <b>pBAD24</b>         | Arabinose-inducible plasmid                                                                                                                                                                                                                                                                                                                                                                                                             | Amp <sup>r</sup>           | Invitrogen          |
| <b>pMAK580</b>        | pBR325 encoding <i>bolA</i> with its own promoters                                                                                                                                                                                                                                                                                                                                                                                      | pBR325/Cat <sup>r</sup>    | (4)                 |
| <b>pSUB11</b>         | Plasmid encoding the 3xflag sequence                                                                                                                                                                                                                                                                                                                                                                                                    | Kan <sup>r</sup>           | (5)                 |
| <b>pCDA02</b>         | pBAD encoding <i>bolA</i>                                                                                                                                                                                                                                                                                                                                                                                                               | pBAD/Amp <sup>r</sup>      | This study          |
| <b>pSP417</b>         | Plasmid encoding <i>lacZ</i>                                                                                                                                                                                                                                                                                                                                                                                                            | pBR322/Amp <sup>r</sup>    | (6)                 |
| <b>pSBA01</b>         | pSP417 encoding <i>lacZ</i> under the control of <i>mreBCD</i> promoter                                                                                                                                                                                                                                                                                                                                                                 | pSP417/Amp <sup>r</sup>    | This study          |
| <b>pSBA02</b>         | pSP417 encoding <i>lacZ</i> under the control of a modified <i>mreBCD</i> promoter                                                                                                                                                                                                                                                                                                                                                      | pSP417/Amp <sup>r</sup>    | This study          |

<sup>a</sup> Abbreviations: Kan, kanamycin; Amp, ampicillin; Cam, chloramphenicol;

## References

1. **Guyer MS, Reed RR, Steitz JA, Low KB.** 1981. Identification of a sex-factor-affinity site in *E. coli* as gamma delta. *Cold Spring Harbor symposia on quantitative biology* **45 Pt 1**:135-140.
2. **Casadaban MJ, Cohen SN.** 1980. Analysis of gene control signals by DNA fusion and cloning in *Escherichia coli*. *Journal of molecular biology* **138**:179-207.
3. **Freire P, Moreira RN, Arraiano CM.** 2009. BolA inhibits cell elongation and regulates MreB expression levels. *Journal of molecular biology* **385**:1345-1351.
4. **Aldea M, Hernandez-Chico C, de la Campa AG, Kushner SR, Vicente M.** 1988. Identification, cloning, and expression of bolA, an ftsZ-dependent morphogene of *Escherichia coli*. *Journal of bacteriology* **170**:5169-5176.
5. **Uzzau S, Figueroa-Bossi N, Rubino S, Bossi L.** 2001. Epitope tagging of chromosomal genes in *Salmonella*. *Proceedings of the National Academy of Sciences of the United States of America* **98**:15264-15269.
6. **Podkovyrov SM, Larson TJ.** 1995. A new vector-host system for construction of lacZ transcriptional fusions where only low-level gene expression is desirable. *Gene* **156**:151-152.
